# Supplementary material
Source: Copernicus journal article supplement (doi:10.5194/hess-30-3903-2026)
Supplement: Supplementary file [file hess-30-3903-2026-supplement-title-page.pdf › hess-30-3903-2026-supplement-title-page.pdf]

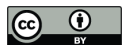

*Supplement of*

**Assessing future streamflow in Cyprus through hydrological model calibration under non-stationary climate and regional climate model ensemble selection**

**Ioannis Sofokleous et al.**

*Correspondence to:* Ioannis Sofokleous (i.sofokleous@cyi.ac.cy)

- hess-30-3903-2026-supplement-title-page.pdf
- EGUSPHERE-2025-2478\_Supplemental\_material.xlsx

The copyright of individual parts of the supplement might differ from the article licence.
